# Supplementary material for: Patterns of Herbivory in Neotropical Forest Katydids as Revealed by DNA Barcoding of Digestive Tract Contents
Source: MDPI journal article supplement (doi:10.3390/d14020152), 2022-02-21
Supplement: s1 [file s1]

**Table S3:** List of katydid samples, plant BLAST result, and collection metadata

| Insect ID | Insect species                  | Plant order    | Plant family   | Plant genus       | Plant species | Primers supporting | Date     | Time | Sex | Location  |
|-----------|---------------------------------|----------------|----------------|-------------------|---------------|--------------------|----------|------|-----|-----------|
| 4027      | <i>Lamprophyllum micans</i>     | Gentianales    | Rubiaceae      | Chimarrhis        | parviflora    | rbc, psb           | 20160102 | 2146 | m   | VC        |
| 4038      | <i>Dolichocercus latipennis</i> | Sapindales     | Meliaceae      | Guarea sp.        |               | rbc, psb           | 20160102 | 2059 | m   | DH        |
| 4022      | <i>Montezumina bradleyi</i>     | Laurales       | Lauraceae      | Nectandra         | lineata       | rbc, psb           | 20160103 | 456  | m   | VC        |
| 4002      | <i>Phylloptera dimidiata</i>    | Malvales       | Malvaceae      | Ceiba             | pentandra     | rbc, matk          | 20160103 | 515  | m   | GH        |
| 4007      | <i>Phylloptera dimidiata</i>    | Malvales       | Malvaceae      | Ceiba             | pentandra     | rbc                | 20160103 | 502  | f   | VC        |
| 4006      | <i>Phylloptera dimidiata</i>    |                | conflict       | conflict          |               | rbc, psb           | 20160103 | 2345 | m   | F         |
| 4014      | <i>Phylloptera dimidiata</i>    | Caryophyllales | Nyctaginaceae  | Guapira           | standleyana   | rbc, psb           | 20160104 | 541  | m   | IT        |
| 4034      | <i>Dolichocercus latipennis</i> | Celastrales    | Celastraceae   | Maytenus          | schippii      | rbc, psb           | 20160104 | 620  | m   | CN        |
| 4003      | <i>Arota festae</i>             | Fabales        | Fabaceae       | Inga              | sp            | rbc                | 20160104 | 51   | m   | GH        |
| 4005      | <i>Hyperphrona irregularis</i>  | Fabales        | Fabaceae       | Inga              |               | rbc                | 20160104 | 31   | f   | HH        |
| 4004      | "Waxy" sp.                      | Fabales        | Fabaceae       | Inga              | sp            | rbc, psb           | 20160104 | 41   | m   | GH        |
| 4045      | <i>Dolichocercus latipennis</i> | Malvales       | Malvaceae      | family level only |               | rbc, psb           | 20160104 | 602  | m   | VC        |
| 4056      | <i>Idiarthron major</i>         | Fabales        | Fabaceae       | Dipteryx          | oleifera      | rbc                | 20160105 | 2326 | m   | DH        |
| 4058      | <i>Idiarthron major</i>         | Fabales        | Fabaceae       | Inga              |               | rbc                | 20160105 | 2318 | m   | F         |
| 4040      | <i>Arota festae</i>             | Malpighiales   | Malpighiaceae  | Malpighia         | romeroana     | rbc                | 20160106 | 500  | m   | G         |
| 4053      | <i>Dolichocercus latipennis</i> | Celastrales    | Celastraceae   | Maytenus          | schippii      | rbc                | 20160107 | 520  | f   | DH        |
| 4054      | <i>Dolichocercus latipennis</i> | Laurales       | Lauraceae      | Nectandra         | lineata       | rbc, psb           | 20160107 | 530  | m   | VC        |
| 4055      | <i>Dolichocercus latipennis</i> | Laurales       | Lauraceae      | Nectandra         | lineata       | rbc, psb           | 20160107 | 558  | m   | VC        |
| 4083      | <i>Euceraia insignis</i>        |                | conflict       | conflict          |               | rbc, psb           | 20160107 | 547  | m   | IT        |
| 4061      | <i>Dolichocercus latipennis</i> | Laurales       | Lauraceae      | Nectandra         | lineata       | rbc, psb           | 20160108 | 532  | m   | VC        |
| 4086      | <i>Dolichocercus latipennis</i> | Laurales       | Lauraceae      | Nectandra         | lineata       | rbc, psb           | 20160129 | 531  | m   | VC        |
| 4080      | <i>Phylloptera dimidiata</i>    | Malvales       | Malvaceae      | Ceiba             | pentandra     | rbc, matk          | 20160129 | 59   | f   | VC        |
| 4068      | "Waxy" sp.                      | Sapindales     | Anacardiaceae  | Anacardium        | excelsum      | rbc, matk          | 20160130 | 528  | m   | DH        |
| 4087      | <i>Dolichocercus latipennis</i> | Laurales       | Lauraceae      | Nectandra         | lineata       | rbc, psb           | 20160202 | 2247 | f   | VC        |
| 4073      | <i>Lamprophyllum micans</i>     | Sapindales     | Anacardiaceae  | Anacardium        | excelsum      | rbc, matk          | 20160202 | 24   | m   | DH        |
| 4067      | <i>Lamprophyllum micans</i>     | Laurales       | Lauraceae      | Nectandra         | lineata       | rbc, psb           | 20160205 | 2200 | m   | Romer Lab |
| 4065      | <i>Lamprophyllum micans</i>     |                | conflict       | conflict          |               | rbc, psb           | 20160206 | 100  | m   | F         |
| 4081      | <i>Phylloptera dimidiata</i>    | Malpighiales   | Phyllanthaceae | Margaritaria      | nobilis       | rbc                | 20160207 | 1    | m   | GH        |

|      |                                 |              |               |                   |            |                |          |      |   |         |
|------|---------------------------------|--------------|---------------|-------------------|------------|----------------|----------|------|---|---------|
| 4090 | <i>Phylloptera dimidiata</i>    | Fabales      | Fabaceae      | Swartzia          | simplex    | rbc            | 20160209 | 2308 | m | DH      |
| 1    | <i>Anaulacomera furcata</i>     | Laurales     | Lauraceae     | Nectandra         | lineata    | rbc            | 20161229 | 1835 | f | CN      |
| 32   | <i>Dolichocercus latipennis</i> | Laurales     | Lauraceae     | Nectandra         | lineata    | rbc            | 20161230 | 2000 | f | Laundry |
| 79   | <i>Montezumina bradleyi</i>     | Laurales     | Lauraceae     | Nectandra         | lineata    | rbc, psb       | 20161230 | 1400 | m | VC      |
| 90   | <i>Montezumina bradleyi</i>     | Fabales      | Fabaceae      | Inga              |            | rbc, psb, matk | 20161231 | 431  | m | VC      |
| 91   | <i>Docidocercus gigliotosi</i>  | Malpighiales | Malpighiaceae | Malpighia         | romeroana  | rbc, psb       | 20161231 | 530  | m | C       |
| 82   | <i>Dolichocercus latipennis</i> | Santalales   | Olacaceae     | Heisteria         | concinna   | rbc, matk      | 20161231 | 530  | m | Laundry |
| 81   | <i>Dolichocercus latipennis</i> |              | conflict      | conflict          |            | rbc, psb       | 20161231 | 535  | m | G       |
| 229  | <i>Anaulacomera spatulata</i>   | Laurales     | Lauraceae     | Nectandra         | lineata    | rbc            | 20170100 | NA   | m | Unk     |
| 310  | <i>Anaulacomera furcata</i>     | Fabales      | Fabaceae      | Swartzia          | simplex    | rbc            | 20170102 | 2256 | f | NL      |
| 281  | <i>Montezumina bradleyi</i>     | Laurales     | Lauraceae     | Nectandra         | lineata    | rbc, psb       | 20170102 | 2359 | f | HH      |
| 324  | <i>Anaulacomera spatulata</i>   | Ericales     | Lecythidaceae | Gustavia          | superba    | rbc, psb       | 20170103 | 554  | m | E       |
| 228  | <i>Anaulacomera spatulata</i>   | Fabales      | Fabaceae      | family level only |            | rbc, psb       | 20170103 | 6    | f | DH      |
| 265  | <i>Lamprophyllum micans</i>     | Laurales     | Lauraceae     | Nectandra         | lineata    | rbc            | 20170103 | 2357 | m | DH      |
| 284  | <i>Anaulacomera furcata</i>     | Rosales      | Cannabaceae   | Trema             | micrantha  | rbc            | 20170103 | 18   | f | DH      |
| 270  | <i>Anaulacomera "wallace"</i>   | Laurales     | Lauraceae     | Nectandra         | lineata    | rbc            | 20170104 | 32   | f | CTFS    |
| 316  | <i>Anaulacomera "wallace"</i>   | Laurales     | Lauraceae     | Nectandra         | lineata    | rbc            | 20170104 | 30   | f | VC      |
| 226  | <i>Anaulacomera spatulata</i>   | Laurales     | Lauraceae     | Nectandra         | lineata    | rbc            | 20170104 | 2313 | m | Laundry |
| 184  | <i>Anaulacomera spatulata</i>   | Sapindales   | Sapindaceae   | Cupania           | rufescens  | rbc, psb       | 20170104 | 2309 | m | NL      |
| 306  | <i>Dolichocercus latipennis</i> |              | conflict      | conflict          |            | rbc, psb, matk | 20170104 | 30   | m | VC      |
| 217  | <i>Anaulacomera furcata</i>     | Fabales      | Fabaceae      | Inga              | mixed      | rbc, psb       | 20170105 | 2346 | f | VC      |
| 183  | <i>Anaulacomera spatulata</i>   | Laurales     | Lauraceae     | Nectandra         | lineata    | rbc            | 20170105 | 6    | m | VC      |
| 180  | <i>Phylloptera dimidiata</i>    |              | conflict      | conflict          |            | rbc, psb, matk | 20170105 | 3    | m | VC      |
| 317  | <i>Dolichocercus latipennis</i> | Laurales     | Lauraceae     | Ocotea            | sp         | rbc, psb, matk | 20170106 | 502  | m | VC      |
| 368  | <i>Montezumina bradleyi</i>     | Fabales      | Fabaceae      | Inga              | sp         | rbc, psb, matk | 20170109 | 845  | f | VC      |
| 375  | <i>Montezumina bradleyi</i>     | Fabales      | Fabaceae      | Inga              | sp         | rbc, psb       | 20170110 | 513  | f | VC      |
| 377  | <i>Microcentrum championi</i>   | Laurales     | Lauraceae     | Ocotea            | puberula   | rbc, psb       | 20170110 | 559  | m | NL      |
| 1594 | <i>Anaulacomera furcata</i>     | Fabales      | Fabaceae      | Tachigali         | versicolor | rbc, psb       | 20170118 | 46   | f | DH      |
| 1587 | <i>Phylloptera dimidiata</i>    | Malpighiales | Malpighiaceae | Malpighia         | romeroana  | rbc, psb       | 20170120 | 524  | f | IT      |

|      |                               |            |               |            |            |                |          |      |   |      |
|------|-------------------------------|------------|---------------|------------|------------|----------------|----------|------|---|------|
| 1513 | <i>Anaulacomera spatulata</i> | Fabales    | Fabaceae      | Inga       | punctata   | psb            | 20170122 | 2355 | f | E    |
| 1484 | <i>Anaulacomera furcata</i>   | Ericales   | Sapotaceae    | Pouteria   | fossicola  | rbc            | 20170124 | 2343 | f | VC   |
| 1528 | <i>Microcentrum "polka"</i>   | Fabales    | Fabaceae      | Inga       |            | rbc            | 20170124 | 600  | m | F    |
| 1604 | <i>Arota festae</i>           | Sapindales | Anacardiaceae | Anacardium | excelsum   | rbc            | 20170124 | 40   | f | DH   |
| 1575 | <i>Anaulacomera furcata</i>   | Sapindales | Sapindaceae   | Cupania    | cinerea    | rbc, psb       | 20170124 | 140  | f | IT   |
| 1567 | <i>Microcentrum championi</i> | Sapindales | Sapindaceae   | Cupania    | cinerea    | rbc, psb, matk | 20170124 | 105  | f | DH   |
| 1553 | <i>Microcentrum championi</i> | Sapindales | Anacardiaceae | Spondias   | radlkoferi | rbc            | 20170125 | 106  | m | SL   |
| 1423 | <i>Microcentrum championi</i> | Malvales   | Malvaceae     | Luehea     | seemannii  | rbc, psb, matk | 20170206 | 452  | m | B    |
| 1481 | <i>Anaulacomera spatulata</i> | Fabales    | Fabaceae      | Inga       | goldmanii  | rbc            | 20170215 | 2338 | m | VC   |
| 1243 | <i>Lamprophyllum micans</i>   | Sapindales | Anacardiaceae | Anacardium | excelsum   | rbc            | 20170224 | 508  | m | CTFS |
| 1263 | <i>Euceraia insignis</i>      | Sapindales | Anacardiaceae | Anacardium | excelsum   | rbc            | 20170226 | 537  | m | DH   |
| 1251 | <i>Euceraia insignis</i>      | Sapindales | Sapindaceae   | Cupania    | sp         | psb            | 20170301 | 502  | m | VC   |
| 1407 | <i>Phylloptera dimidiata</i>  | Sapindales | Sapindaceae   | Cupania    | latifolia  | psb            | 20170301 | 454  | f | CN   |
| 1318 | <i>Ceraia mytra</i>           | Lamiales   | Bignoniaceae  | Jacaranda  | copaia     | rbc, psb       | 20170302 | 551  | f | VC   |
