# Supplementary material for: Patterns of Herbivory in Neotropical Forest Katydids as Revealed by DNA Barcoding of Digestive Tract Contents
Source: MDPI journal article supplement (doi:10.3390/d14020152), 2022-02-21
Supplement: s1 [file s1]

**Table S1:** Primers utilized for DNA barcode amplification

| <b>Amplicon</b> | <b>Primer</b> | <b>Direction</b> | <b>Sequence</b>                   |
|-----------------|---------------|------------------|-----------------------------------|
| rbc             | rbcLa_SI_For  | Forward          | 5'-ATGTCACCACAAACAGAGACTAAAGC-3'  |
| rbc             | rbcLa_SI_Rev  | Reverse          | 5'-GTAAAATCAAGTCCACCRCG-3'        |
| psb             | psbA3'f       | Forward          | 5'-GTTATGCATGAACGTAATGCTC-3'      |
| psb             | trnH          | Reverse          | 5'-CGCGCATGGTGGATTCACAATCC-3'     |
| matK            | matKfor_KIM3F | Forward          | 5'-CGTACACAGTACTTTTGTGTTTACGAG-3' |
| matK            | matKrev_KIM1R | Reverse          | 5'-ACCCAGTCCATCTGAAATCTTGGTTC-3'  |
